## Current Bibliography.

Prepared by the Editor.

---

**N**OTE. The scope of the Bibliography is limited in the main to the area covered by the Council's activities, but there are included papers of general interest relating to other areas in the North Temperate and Arctic regions and exceptionally elsewhere. Limnological references are not as a rule given, but papers relating to brackish waters and to salmon and freshwater fish studied by the Council are included.

The classification of entries follows in a general way that adopted in Dr. ALLEN's Selected Bibliography published in Nos. 1 and 2 of the *Journal*, and since reprinted.

Subscribers and those on the distribution list will receive regularly upon application to the General Secretary copies of the Bibliography printed on one side of the page only, for use in making up card indices.

The Editor will be glad to be advised of emendations and additions to the Bibliography.

## Physical and Biological Conditions in the Sea.

- ATKINS, W. R. G. A quantitative consideration of some factors concerned in plant growth in water. Part II. Some chemical factors. Journ. du Cons. I, No. 3, 197—226, 1926.

### GENERAL HYDROGRAPHY

- CONSEIL INT. POUR L'EXPLOR. DE LA MER. Bulletin Hydrographique pour l'Année 1925. 1926.
- CONSEIL INT. POUR L'EXPLOR. DE LA MER. Bulletin Hydrographique. Appendice Supplémentaire d'Observations de Surface anglaises pour la Période 1915—1923. 1926.
- CONSEIL INT. POUR L'EXPLOR. DE LA MER. Bulletin Hydrographique. Appendices I & II pour les Années 1923 and 1924. 1926.
- HELLAND-HANSEN, B. & NANSEN, F. The Eastern North Atlantic. Geofysiske Publ. Norske Videnskaps-Akademi, IV, No. 2, Oslo 1926.
- MERZ, A. Die Deutsche Atlantische Expedition auf dem Vermessungs- und Forschungsschiff "Meteor". I. Bericht. Sitzungsberichte der Preussischen Akademie der Wissenschaften. XXXI, 1925.
- SCHOTT, G. Geographie des Atlantischen Ozeans. 2. Aufl., Hamburg, 1926.

## Physics and Chemistry of Sea Water.

### GENERAL

- MACALLUM, A. B. The Paleochemistry of the Body Fluids and Tissues. Physiological Reviews, VI, No. 2, p. 316, Baltimore, U. S. A., 1926. *Bibliography.*

### SALINITY AND TEMPERATURE

- CASEY, M. T. A simple Method of Temperature control for use with Refractometers and Polarimeters. Scien. Proc. Roy. Dublin Soc. XVIII, Sept. 1926.
- DANIEL, R. J. Hydrographic Observations. Rep. on the Invs. carried out during 1925 at the Sea Fisheries Laboratory in the University of Liverpool. 43—63, 1926.
- FICKER, H. Temperatur und vertikale Temperaturabnahme auf Teneriffa. Köppen-Heft der Ann. der Hydrog. und Marit. Met. Beiheft zur Sept. Nummer 1926, 27—32.
- GROSSE, W. Erhöhung der Jahresmitteltemperatur im Gebiet des Nordatlantischen Ozeans. Köppen-Heft der Ann. der Hydrog. und Marit. Met. Beiheft zur Sept. Nummer 1926, 38—41.
- HELLMANN, G. Beitrag zur Frage nach der Eintrittszeit des täglichen Maximum der Lufttemperatur auf dem Meere. Köppen-Heft der Ann. der Hydrog. und Marit. Met. Beiheft zur Sept. Nummer 1926, 54—56.
- JAPAN. Table of Mean Temperature and Specific Gravity (Regular Oceanic Cross Observations). Quart. Report Ocean. Invs. Imperial Fisheries Institute, Tokyo. No. 32, July 1926.
- MOLTSCHANOFF, P. Ein neuer Tiefsee Thermograph. System P. A. Moltschanoff. Ann. Hydrog. und Marit. Met. LIV, Heft VIII, 319—320, 1926.
- PEPPLER, W. Die Temperaturverhältnisse am Bodensee bei kalten, abländigen Winden. Doppel-Heft der Ann. der Hydrog. und Marit. Met. Beiheft zur Sept. Nummer 1926, 68—71.
- SCHOTT, G. Bericht über die hydrographischen Untersuchungen. Berichte der Deutschen Wiss. Komm. f. Meeresf. Neue Folge II, Heft 4, 54—57. 1926.

- SCHULZ, B. Vorbericht über die hydrographischen Arbeiten auf der Ostsee-Poseidon-fahrt April 1925. *Berichte der Deutschen Wiss. Komm. f. Meeresf. Neue Folge* II, Heft 4, 68—70. 1926.
- SUND, O. Correction of temperatures. *Journ. du Cons.* I, No. 3, 242—244. 1926.
- SUND, O. Graphical Calculation of specific volume and dynamic depth. *Journ. du Cons.* I, No. 3, 235—241. 1926.
- SVENSKA HYDROGRAFISK-BIOLOGISKA KOMMISSIONENS FYRSKEPPSUNDERSÖKNING, År 1925. 1926.

#### NITROGENOUS COMPOUNDS

- ADENEY, W. E. & DAWSON, B. B. Estimation of Organic Matter in Water by means of Potassium Bichromate and Sulphuric Acid. *Sci. Proc. Royal Dublin Soc.* XVIII, No. 17. 1926.

#### OTHER CONSTITUENTS

- ATKINS, W. R. G. The Phosphate Content of Sea-water in relation to the Growth of Algal Plankton. Part III. *Journ. M. B. A.* XIV, No. 2, 447—467. 1926.
- IRVING, L. The Precipitation of Calcium and Magnesium from Sea-water. *Journ. M. B. A.* XIV, No. 2, 441—446. 1926.

#### Currents.

- CARRUTHERS, J. N. Observations on Lightvessels. Memorandum for Guidance in making observations with the Drift Indicator. M. A. F. Fisheries Lab. Lowestoft (Typescript). 1926.
- CARRUTHERS, J. N. The Water Movements in the Southern North Sea. Pt. II, The Bottom Currents. *Fishery Investig. Ser. II, IX*, No. 3. 1926.
- GRESSWELL, M. Tides and Currents, and the Effect of the Wind on the Water Level near the Shore with Set and Drift associated. *Marine Observer*, III, 137—140. 1926.
- DEFANT, A. Die Austauschgrösse der atmosphärischen und oceanischen Zirkulation. *Köppen-Heft der Ann. der Hydrog. und Marit. Met.* Beiheft zur Sept. Nummer 1926, 12—17.
- EKMAN, V. W. Können Verdunstung und Niederschlag im Meere merkliche Kompensationsströme verursachen? *Ann. Hydrog. und Marit. Met.* LIV, Heft VII, 261—270. 1926.

#### TIDES

- BARTELS, J. Barometrische Messung der Hochseezeiten. *Ann. Hydrog. und Marit. Met.*, LIV, Heft VII, 270—273. 1926.
- PROUDMAN, J. A Special Case of Tidal Motion in a Semicircular Basin. *Geophysical Supplement June 1926*, Royal Astronomical Society, London.
- UNIVERSITY OF LIVERPOOL, Tidal Institute, Seventh Annual Report. 1926.

#### WIND

- SIMPSON, G. C. The Velocity Equivalents of the Beaufort Scale. *Meteorological Office*, London. *Professional Notes*, No. 44. 1926.

#### Light, Colour and Transparency.

- ATKINS, W. R. G. & POOLE, H. H. Photo-electric Measurements of Illumination in relation to Plant Distribution, Pt. 1. *Sci. Proc. Royal Dublin Soc.* XVIII, No. 25. 1926.

#### Oceanography — Miscellaneous.

- BEEBE, W. The Arcturus Adventure. London 1926. [New York Zoological Society's Oceanographical Expedition to Sargasso Sea and Pacific.]
- CARPENTER, A. & BARKER, Sir D. W. *Nature Notes for Ocean Voyagers.* 2nd Ed. London, 1926.
- DEBENHAM, F. The Captain Scott Polar Research Institute. *Geographical Journal*, LXVIII, No. 1. 1926.

## Plankton.

- BUCKMANN, A. Copelata. Die Tierwelt der Nord- und Ostsee (Grimpe u. Wagler). Lfg. 5. Teil 12, a., Leipzig 1926.
- DAVIDSON, V. M. & HUNTSMAN, A. G. The Causation of Diatom Maxima. *Trans. of the Royal Soc. of Canada*. 3rd Ser., XX, Section V, 119—125, 1926.
- FARRAN, G. P. Biscayan Plankton collected during a Cruise of H. M. S. Research 1900. Part XIV, The Copepoda. *Journ. Linn. Soc. (Zool.)* XXXVI, 219—310. 1926.
- GURNEY, R. The Protozoal Stage in Decapod Development. *Annals & Mag. of Nat. Hist.*, XVIII, July, 1926.
- ISSEL, R. Ricerche sulle variazioni del Plancton nelle acque di Rovigno e di Quarto (1922—23). *R. Com. Tal. Ital. Mem.* CXV. 1925.
- ISSEL, R. Contributo alla conoscenza ecologica delle larve planctoniche di Cefalopodi. *R. Com. Tal. Ital. Mem.* CXX. 1925.
- KOFOID, C. A. On Oxyphysis oxytoxoides. Gen. nov., Sp. Nov. A dinophyoid Dinoflagellate convergent towards the peridinoid type. *Univ. of Cal. Pub. in Zool.* XXVIII, No. 10, 203—216. 1926.
- LEBOUR, M. V. A General survey of Larval Euphausiids, with a Scheme for their Identification. *Journ. M. B. A.* XIV, No. 2, 519—527. 1926.
- MIELCK, W. Die Verbreitung der grösseren Planktontiere in der Ostsee April 1925. *Berichte der Deutschen Wiss. Komm. f. Meeresf. Neue Folge Bd. II, Heft 4*, 87—91. 1926.
- NEEDHAM, G. H. A New Method for Washing Diatoms. *Journ. Roy. Micr. Soc. Ser. II*, XLVI, 110—111, 1926.
- PESTA, O. Sur une collection de Copépodes pélagiques provenant des croisières des yachts du Prince Albert Ier de Monaco. *Bull. de l'Inst. Ocean. Monaco*. No. 477. 1926.
- RANSON, G. Sur quelques Méduses des côtes de la Manche. *Bull. du Muséum National d'Hist. Nat. Année* 1925. No. 6.
- SANTUCCI, R. Contributo allo studio dello sviluppo post-embriale degli "Scyllaridea" del Mediterraneo. *R. Com. Tal. Ital. Mem.* CXXI. 1925.
- SMITH, H. T. Phosphorescence of the Sea. *Marine Observer*, III, 193—6, 1926.
- STEUER, A. Copepoda; Cephalophanes G. O. Sars 1907 Systematik und Verbreitung der Gattung. *Wiss. Ergebn. d. Deutschen Tiefsee-Expedition 1898—99. XXIII, Heft 4*. 1926.
- WULFF, A. Nannoplankton-Untersuchungen in der Nordsee. *Wiss. Meeresuntersuch. Helgoland*, XV, Nr. 16, 1—43. 1926.
- WULFF, A. Die Untersuchungen über die Menge und Zusammensetzung des Planktons mit der Zentrifugier-Methode. *Berichte der Deutschen Wiss. Komm. f. Meeresf. Neue Folge Bd. II, Heft 4*, 71—76. 1926.
- WULFF, A. Verbreitung und Häufigkeit der Diatomeen nach den Untersuchungen des Zentrifugenplanktons in der Ostsee im April 1925. *Berichte der Deutschen Wiss. Komm. f. Meeresf. N. F. II, Heft 4*, 77—86. 1926.

## VERTICAL MOVEMENTS OF PLANKTON

- RUSSELL, F. S. The Vertical Distribution of Marine Macroplankton. IV. The Apparent Importance of Light Intensity as a Controlling Factor in the Behaviour of Certain Species in the Plymouth Area. *Journ. M. B. A.* XIV, No. 2, 415—440. 1926.
- RUSSELL, F. S. The Vertical Distribution of Marine Macroplankton. III. Diurnal Observations on the Pelagic Young of Teleostean Fishes in the Plymouth Area. *Journ. M. B. A.* XIV, No. 2, 387—414. 1926.
- SOUTHERN, R. & GARDINER, A. C. A Preliminary Account of some Observations on the Diurnal Migration of the Crustacea of the Plankton of Lough Derg. *Int. Revue der Ges. Hyd. und Hydrog.* XV, Heft 5/6, 323—326. 1926.

## FOOD OF PLANKTON ANIMALS

- PÜTTER, A. Die Ernährung der Copepoden. *Arch. f. Hydrobiologie*, XV, 70—117, Stuttgart, 1925.

**Bottom Fauna.****GENERAL**

- HAGMEIER, A. Die Arbeiten mit dem Petersenschen Bodengreifer auf der Ostseefahrt April 1925. Berichte der Deutschen Wiss. Komm. f. Meeresf. Neue Folge II, Heft 4, 92—95. 1926.
- HUNT, O. D. A new Method for Quantitative Sampling of the Sea Bottom. Journ. M. B. A. XIV, No. 2, 529—534. 1926.
- TSHUGUNOV, N. L. Essay on the Quantitative Exploration of the Benthos-Production in the North part of the Caspian Sea and of the typical Basins in the Volga Delta. Reports Ichthyol. Lab. Astrachan, V., No. 1, 1923.

**SPECIAL GROUPS**

- SCHAEFFER, A. A. Taxonomy of the Amebas, with Descriptions of Thirty-nine new Marine and Freshwater Species. Papers from Dept. Marine Biology, Carnegie Institution, Washington, 1926.
- BRUCE, J. R. The Metabolism of the Shore-Living Dinoflagellates. I. — Salinity and Carbon-Assimilation in Amphidinium. British Journal of Experimental Biology, II, 413—425. 1925.
- TOTTON, A. K. Note on a rare Atlantic Hydroid. Ann. & Mag. of Nat. Hist. XVIII, 196—200. 1926.
- BAYLIS, H. A. & DAUBNEY, R. A Synopsis of the Families and Genera of Nematoda. Brit. Museum (Nat. Hist.), London. 1926.
- ELMHIRST, R. Two Sand-dwelling Nemertine Worms new to Britain (Notes from Millport Marine Laboratory, No. 3). The Scottish Naturalist. May-June, 1926.
- ELMHIRST, R. & STEPHENSON. On Lumbricillus Scoticus n. sp. Journ. M. B. A. XIV, No. 2, 469—473. 1926.
- MONRO, C. C. A. Polychaeta of the "Alert" Expedition. Families Hesoniidae and Nereidae. Journ. Linn. Soc. (Zool.), XXXVI, 311—323. 1926.
- MARCUS, E. Bryozoa. Die Tierwelt der Nord- und Ostsee (Grimpe u. Wagler), Lfg. 4, Teil 7, c, Leipzig 1926.
- MILLAR, W. L. The Seasonal Infestation of *Nassa obsoleta* (Say) with Larval Trematodes. Biol. Bull. Woods Hole, Mass. L, No. 6, 490—508. 1926.
- LAMY, ED. Mollusques testacés de la croisière 1925 du Pourquoi-Pas? dans l'Atlantique, et les mers boréales. Bull. du Muséum National d'Hist. Nat. Ann. 1926, No. 3, 179—181.
- HAAS, F. Lamellibranchia. Die Tierwelt der Nord- und Ostsee (Grimpe u. Wagler), Lfg. 5, Teil 9, d, Leipzig 1926.
- ROBSON, G. C. Notes on the Cephalopoda. — II. Ann. and Mag. of Nat. Hist. XVIII, 350—356. 1926.
- ATKINS, D. The Moulting Stages of the Pea-Crab (*Pinnotheres pisum*). Journ. M. B. A. XIV, No. 2, 475—493. 1926.
- SCHFELLENBERG, A. Amphipoda 3: Die Gammariden. Wiss. Ergebn. d. Deutschen Tiefsee-Expedition 1898—99. XXIII, Heft 5. 1926.
- McINTOSH, W. C. Additions to the Marine Fauna of St. Andrews since 1874. Ann. & Mag. Nat. Hist. XVIII, 241—246. 1926.

**Biological — Miscellaneous.**

- HELDT, H. Sur la résistance à l'asphyxie des principales espèces d'animaux marins. Station Océanographique de Salammô. Notes No. 2. 1926.
- PARKER, G. H. The Growth of Turtles. Proc. Nat. Acad. Sci. Washington XII, No. 7. 1926.
- PEARSE, A. S. Animal Ecology. McGraw-Hill Book Co. New York, 1926.
- ROBERTS, C. H. Oil Pollution. Journ. du Cons. I, No. 3, 245—275. 1926.

**Fishery Investigations.****GENERAL**

- LE DANOIS, ED. Travaux de l'Office des Pêches depuis son origine. Office Sci. et Techn. Pêches Marit. Notes et Rapports. No. 50, Paris, 1926.

- LE DANOIS, ED. Rapport sur le Fonctionnement de l'Office Scientifique et Technique des Pêches pendant l'année 1925. Office Sci. et Techn. Pêches Marit. Notes et Rapports No. 49, Paris 1926.
- LE DANOIS, ED. Rapport Atlantique 1925. Rapp. et Proc. Verb. XL, 1926.
- EHRRENBAUM, E. Bericht über die Arbeiten in der Fischereibiologischen Abteilung des Zoolog. Staatsinstituts in Hamburg. Berichte der Deutschen Wiss. Komm. f. Meeresf. Neue Folge II. Heft 4, 37—42. 1926.
- STRODTMANN, S. Die Fischereiuntersuchungen. Berichte der Deutschen Wiss. Komm. f. Meeresf. Neue Folge II. Heft 4, 107—116. 1926.
- STRODTMANN, S. Die Untersuchungsfahrt des Reichsforschungsdampfers "Poseidon" in der Ostsee im Juli 1926. Mitt. des Deut. Seefischerei Ver. XXXVII. Nr. 8, 241—261. 1926.

#### COMMERCIAL FISHERIES

- DU BATY, R. RALLIER. La Pêche sur les Bancs de Terre-Neuve et autour des îles de St-Pierre et Miquelon. Mémoires (Série spéc.) No 5. Office Sci. Techn. Pêches Maritimes. Paris 1926.
- DE BUEN, R. La primer carta de pesca española. Bol. de Pesca X. March 1925.
- CONSEIL INT. POUR L'EXPLOR. DE LA MER. Bulletin statistique des Pêches Maritimes. XIII, pour l'année 1923. Copenhague, 1926.
- ENGLAND. Report on Sea Fisheries for the Year 1925. Ministry of Agriculture and Fisheries 1926.
- FRANCE. Statistique des Régions de Pêches, Année 1925, 1er Semestre. Office Sci. Techn. Pêches Marit. Notes et Mémoires No. 46. Paris 1926.
- GERMANY. Jahresbericht über die Deutsche Fischerei 1925. Verlag. Gebr. Mann. Berlin, June 1926.
- LATVIA. Bulletin statistique des Pêches maritimes de Lettonie Année 1925. Rédigé par V. Miežis. Riga 1926.
- MARCHAND, J. B. E. La Pêche au Maroc. Geo. Ray, 44, Avenue Daumesnil. Paris, 1926.
- SCHNAKENBECK, W. Die deutsche Seefischerei im Jahre 1925. Der Fischerbote XVIII. Heft 18. 395—403. 1926.
- STEFFEN, W. Die grosse Heringsfischerei in Deutschland. Der Fischerbote. XVIII. Heft 14, 315—325. 1926.

#### FISHING GEAR

- RADCLIFFE, W. Fishing from the Earliest Times. 2nd Ed. London 1926.
- SCHOFIELD, W. L. Purse Seines for California Sardines. Cal. Fish. & Game. XII, No. 1, 16—19. 1926.

#### Fishes.

##### GENERAL

- BARNARD, K. H. The Eggs of the Pilot fish (*Naukrates ductor*). Nature CXVIII, 228, 1926.
- BATTLE, H. I. Effects of Extreme Temperatures on Muscle and Nerve tissue in Marine Fishes. Trans. of the Royal Soc. of Canada, 3rd Ser. XX, Section V. 127—143. 1926.
- BAUER, V. Sui riflessi che regolano il movimento rettilineo nei pesci. R. Com. Tal. Ital. Mem. CXVII. 1925.
- BORLEY, J. O. & THURSBY-PELHAM, D. E. Distribution of the Food Fishes in the North Sea during 1923 and 1924. Fish. Invs. Ser. II. IX, No. 4. 1926.
- DE BUEN, F. Catalogo ictológico del Mediterraneo español y de Marruecos. Resultado de las campañas realizadas por acuerdos internacionales. Ministerio de Marina, Madrid, 1926.
- DE BUEN, F. El *Diretmus argenteus* Johnson (Pez abismal) Ministerio de Marina — Dirección general de Pesca. Notas y Resúmenes Ser. II, No. 12, Madrid 1926.
- DE BUEN, F. El "Cetorhinus maximus" (Gunn.). Bol. de Pesca. X. July 1925.
- CHABANAUD, P. Description d'une espèce nouvelle de Sole originaire de l'Atlantique orientale. Bull. du Muséum National d'Hist. Nat. Ann. 1926, No. 2, 127—130.
- DUNCKER, G. & MOHR, E. W. Teleostei Physoclisti 1—5. Die Tierwelt der Nord- und Ostsee (Grimpe u. Wagler), Lfg. 4, Teil 12, g. Leipzig 1926.

- EHRENBAUM, E. Fang eines Grauhai (*Notidanus griseus* L.) in der nördlichen Nordsee. Der Fischerbote, XVIII, Heft 15, 344—345. 1926.
- FADDA, G. Sulla rigenerazione delle pinne di *Cyprinodon calaritanus* C. V. R. Com. Tal. Ital. Mem. CXIX. 1925.
- FISCHER, G. Der Iodgehalt der Seefische und seine Bedeutung bei Erkrankungen der Schilddrüse. Mitt. des Deut. Seefischerei-Ver. XXXXII, No. 7, 213—218. 1926.
- FORBES, J. C. Investigation on the Tensile Strength of Strips of Haddock Muscle before and after various Treatments. Trans. of the Royal Soc. of Canada. 3rd Ser. XX, Section V, 148—153. 1926.
- LE GALL, J. Note complémentaire sur le *Centrolophus britannicus* Gunther. Bull. du Muséum National D'Hist. Nat. Année 1925. No. 6.
- GREENE, C. W. The Physiology of the Spawning Migration. Physiological Reviews. VI, No. 2, p. 201. Baltimore, U. S. A. 1926.
- HICKLING, C. F. A new Type of Luminescence in Fishes, II. Journ. M. B. A. XIV, No. 2, 495—507. 1926.
- JOHNSTONE, J. Malignant Tumours in Fishes. Rep. on the Invns. carried out during 1925 at the Sea Fisheries Laboratory in the University of Liverpool. 1926, 19—42.
- KYLE, H. M. & EHRENBAUM, E. Pisces, Allgemeiner Teil. Die Tierwelt der Nord- und Ostsee (Grimpe u. Wagler), Lfg. 4, Teil 12, c. Leipzig 1926.
- PARKER, G. H. The Inquiline Fish Fierasfer at Key West, Florida. Proc. Nat. Acad. Sci. Washington XII, No. 7. 1926.
- RICH, W. H. Progress in Biological Inquiries 1925. Life Histories and Migrations of Cod, Pollock and Haddock. Investigations of Shellfish, Oysters, etc. App. 1 to the Report of the U. S. Commissioner of Fisheries for 1926.
- SCHNAKENBECK, W. Vergleichende Untersuchungen über die Pigmentierung mariner Fische. Ztschr. f. mikr.-anat. Forschung, IV. 1925.
- SIMPSON, W. W. The Effects of Asphyxia and Isectomy on the Blood Sugar of *Myoxocephalus* and *Ameiurus*. American Journal of Physiology, LXXVII. 1926.
- VARIOUS. Nutritive Value of Fish and Shellfish. App. X to the Report of the U. S. Commissioner of Fisheries for 1925, 502—552. 1926.

## EGGS AND LARVAE

- MIELCK, W. Untersuchungen über die pelagische Fischbrut (Eier und Larven) in der Ostsee im April 1925. Berichte der Deutschen Wiss. Komm. f. Meeresf. Neue Folge, Bd. II, Heft 4, 99—106. 1926.
- REMOTTI, E. Sul meccanismo di schiusa delle uova di Teleostei. R. Com. Tal. Ital. Mem. CXVI. 1925.
- SANZO, L. Uova e larve di *Regalecus glesne* Asc. R. Com. Tal. Ital. Mem. CXVIII. 1925.
- SELLA, M. & CIACCHI, O. Uovo e larva dello Scombro del Mediterraneo (*Scomber scomber* Linn.). R. Com. Tal. Ital. Mem. CXIV. 1925.
- SPARTA, A. Uova e Larve di *Fierasfer dentatus*. Cu. R. Com. Tal. Ital. Mem. CXXXII. 1926.

## FOOD AND FEEDING

- HERTLING, H. Untersuchungen des Darminhalts von Fischen. Berichte der Deutschen Wiss. Komm. f. Meeresf. Neue Folge, Bd. II. Heft 4, 96—98. 1926.
- RICHET, C. OXNER & RICHARD, J. L'Alimentation à la viande crue et à la viande cuite chez les Poissons. Bull. de l'Inst. Océan. Monaco. No. 476. 1926.

## PLAICE

- BUCHANAN-WOLLASTON, H. J. Plaice-Egg Production in 1920—21, treated as a Statistical Problem, with comparison between the Data from 1911, 1916 and 1921. Fishery Investigations, Ser. II, IX, No. 2. 1926.
- DILLING, W. J., HEALEY, C. W. & SMITH, W. C. Experiments on the Effects of Lead on the Growth of Plaice (*Pleuronectes platessa*). Annals of Applied Biology, XIII. No. 2. 1926.
- HEIDRICH, H. Die Bedeutung der Scholle für die pommersche Zeesenfischerei. Mitt. des Deut. Seefischerei-Ver. XXXXII, No. 7, 198—212. 1926.
- KYLE, H. M. Die Schollenfrage. Der Fischerbote, XVIII, Heft 16. 1926.

LÜBBERT, H. Beobachtungen über den Plattfischbestand im Amerikahafen zu Cuxhaven im Jahre 1925. Berichte der Deutschen Wiss. Komm. f. Meeresf. Neue Folge, Bd. II. Heft 4, 59—63. 1926.

## HADDOCK

JOHANSEN, A. C. Das Massenaufreten von Schellfischen in der Beltsee während des Winters 1925—26 und die Aussichten für eine zukünftige Schellfischerei in diesen Gewässern. Mitt. des Deut. Seefischer-Vereins. XXXXII, Nr. 6. 1926.

POULSEN, E. M. Om Kullerens Føde i Nordsøen. Danske Fiskeritidende 24. 3. 26.

## HERRING

FORD, E. & BULL, H. O. Abnormal Vertebrae in Herrings. Journ. M. B. A. XIV, No. 2, 509—517. 1926.

LE GALL, J. Etudes diverses sur la Question du Hareng. Office Sci. Techn. Pêches Marit. Notes et Rapports, No. 48. Paris 1926.

JOHNSTONE, J. Frequency Curves and Herring Investigation. Journ. du Cons. I, No. 3, 276—277. 1926.

LEWIS, H. M. Young Herring Measurements. Rep. on the Invs. carried out during 1925 at the Sea Fisheries Laboratory in the University of Liverpool. 1926, 16—18.

LÜBBERT, H. Heringsfahrten des Reichsforschungsdampfers "Poseidon" vom 28. August bis 15. September und vom 10. bis 21. October 1925. Berichte der Deutschen Wiss. Komm. f. Meeresf. Neue Folge, II. Heft 4, 43—48. 1926.

## TUNNY

BELLON, L. Como se descuartiza el atun. Bol. de Pescas. X. Jan. 1925.

BELLON, L. Preparacion de conservas de atun. La coccion de la carne. Bol. de Pescas. XI. April 1926.

HELDT, H. Résumé de nos Connaissances actuelles sur le Thon rouge (*Oreocynus thynnus* L.) I. Comm. intern. pour l'Exploration de la Mer mediterrannée. Rapp. Proc. Verb. (N. S.) I. 99—120, Paris 1926.

## EEL

GANDOLFI-HORNVOLD, A. L'âge et la croissance de quelques petites Anguilles jaunes de la Sarthe. Bull. de la Soc. centrale d'Aquic. et de Pêche. XXXIII. July-Sept. 1926.

JESPERSEN, P. Age determination of Eels from Norfolk and Cumberland. Journ. du Cons. I, No. 3, 227—234. 1926.

## SKATES AND RAYS

CLARK, R. S. Rays and Skates. A Revision of the European Species. Fishery Board for Scotland Scientific Investigations 1926, No. 1 (Text), No. 1 (Plates).

## SALMON AND FRESHWATER FISH

CALDERWOOD, W. L. Salmon Passes (A Second Paper). Fishery Board for Scotland, Salmon Fisheries 1926, No. 2, Edinburgh & London 1926.

MENZIES, W. J. M. General Index to the Reports and Papers issued by the Fishery Board for Scotland on the Subject of Salmon Fisheries from 1882 to 1924 inclusive. Edinburgh & London, 1926.

NALL, G. H. The Sea Trout of the River Ewe and Loch Marce. Fish. Bd. for Scot. Salmon Fisheries, 1926, No. 1. Edinburgh & London. 1926.

NALL, G. H. Sea Trout of the River Ailort and Loch Eilt. Fishery Board for Scotland, Salmon Fisheries 1926, No. 3. Edinburgh & London, 1926.

PANNETIER. L'âge et le transport des alevins pour le rempoissonnement. Bull. de la Soc. centrale d'Aquic. et de Pêche. XXXIII. July-Sept. 1926.

RIVER POLLUTION AND FISHERIES: a Non Technical Report on the Work during 1925 of the Standing Committee on River Pollution. Ministry of Agriculture and Fisheries, London. 1926.



**Oysters and other Lamellibranchs.**

- BRUCE, J. R. The Respiratory Exchange of the Mussel (*Mytilus edulis* L.). Biochemical Journ. XX, No. 4, 829—846. 1926.
- DANIEL, R. J. & DORAN, W. Some Chemical Constituents of the Mussel (*Mytilus edulis*). Biochemical Journ. XX, No. 4, 676—684. 1926.
- ORTON, J. H. Report on a Survey of the Fal Estuary Oyster Beds (Nov. 1926) with Notes on the Biology of the Oyster (*O. edulis*). Plymouth, J. H. Lake & Co. 1926.
- ORTON, J. H. The Comparative Behaviour of Native Oysters (*O. edulis*) and Portuguese Oyster (*O. angulata*) in Certain lethal Solutions of T. N. T. (Trinitrotoluene). Journ. M. B. A. XIV, No. 2, 281—293. 1926.
- ORTON, J. H. On the rate of Growth of *Cardium edule*. Part 1, Experimental observations. Journ. M. B. A. XIV, No. 2, 239—279. 1926.
- RANSON, G. L'Huitre portugaise tend-elle à remplacer l'Huitre française? Office Sci. et Techn. Pêches Marit. Notes et Mémoires No. 47. Paris 1926.
- YONGE, C. M. The Digestive Diverticula in the Lamellibranchs. Trans. Roy. Soc. Edin. LIV, 703—18. 1926.
- YONGE, C. M. Structure and Physiology of the Organs of Feeding and Digestion in *Ostrea edulis*. Journ. M. B. A. XIV, No. 2, 293—386. 1926.

**LOBSTERS**

- GREAT BRITAIN. Interim Report of Interdepartmental Committee on Crabs and Lobsters. H. M. Stationary Office. London, 1926.
- FISHERY BOARD FOR SCOTLAND. Lobster Experiments (Use of Herring Gut as Bait). Fishing News July 24, 1926. Aberdeen.
- ANON. Arte empleado para la pesca de la langosta en Santander. Bol. de Pesca. X. Aug.—Sept. 1925.
